# Supplementary material for: A simple and straightforward strategy for expedient access to benzoxazoles using chemically engineered 2D magnetic graphene oxide nanosheets as an eco-compatible catalyst
Source: Royal Society of Chemistry journal article supplement (doi:10.1039/d3dt01265d), 2023-01-01
Supplement: d3dt01265d1.pdf [file d3dt01265d1.pdf]

## A simple and straightforward strategy for expedient access to benzoxazoles using chemically engineered 2D magnetic graphene oxide nanosheets as an eco-compatible catalyst

*Aditi Sharma<sup>a</sup>, Shivani Sharma<sup>b</sup>, Sriparna Dutta<sup>c</sup>, Sneha Yadav<sup>a</sup>, Ranjana Dixit,<sup>b</sup> Bhavya Arora<sup>a</sup>, Shilpa Mehta<sup>b</sup>, Anju Srivastava<sup>c</sup> and Rakesh K. Sharma<sup>a\*</sup>*

<sup>a</sup>Green Chemistry Network Centre, Department of Chemistry, University of Delhi, Delhi-110007

Fax: +91-011-27666250; Tel: 011-276666250, Email: rksharmagreenchem@hotmail.com

<sup>b</sup>Department of Chemistry, Ramjas College, University of Delhi, Delhi-110007

<sup>c</sup>Department of Chemistry, Hindu College, University of Delhi, Delhi-110007

| S. No. | Result and Discussion | Page No. |
|--------|-----------------------|----------|
| 1.     | Figure S1             | 2        |
| 2.     | Figure S2             | 2        |
| 3.     | Figure S3             | 3        |
| 4.     | Figure S4             | 3        |
| 5.     | Figure S5             | 4        |

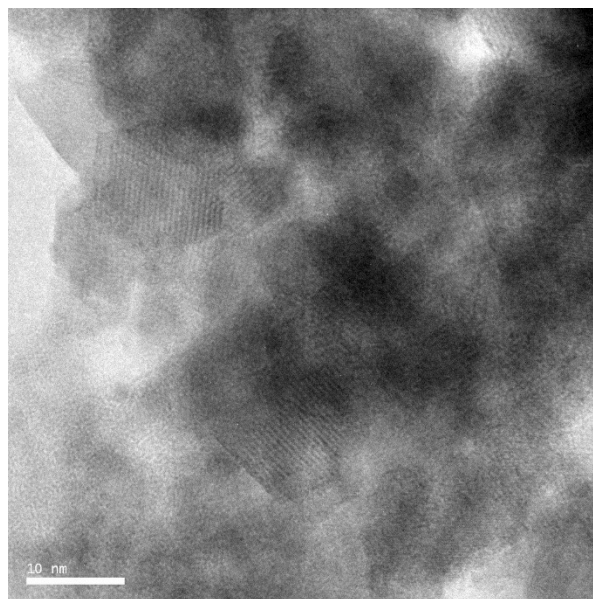

**Figure S1.** Lattice fringes of magnetite nanoparticles

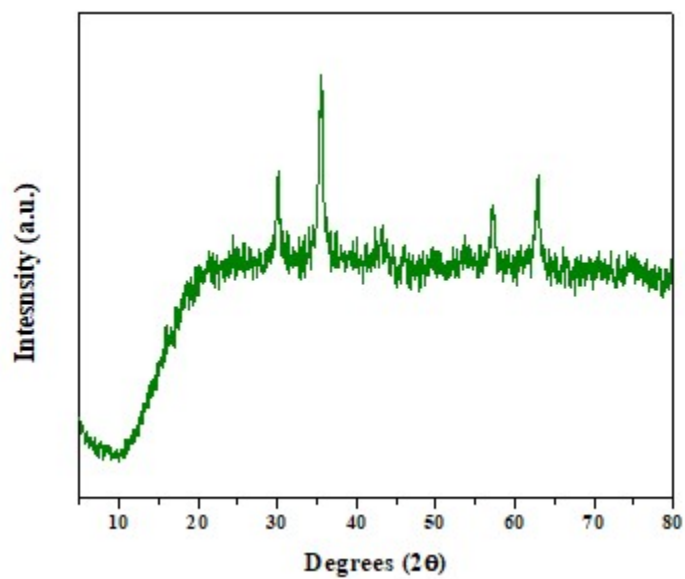

**Figure S2.** Powder XRD of MGO (Fe<sub>3</sub>O<sub>4</sub>-GO).

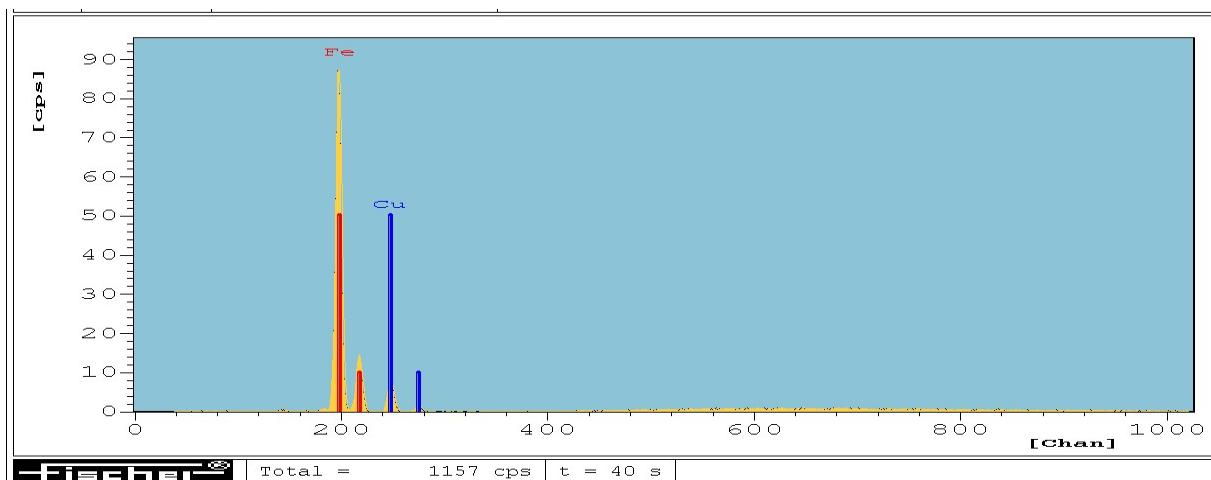

Meas. para. (foreground spectrum):  
 High voltage = 50 kV (875) Prim. Filter = Al1000  
 Collimator 4 = 2.00 Dm. Anode current 138 uA  
 Meas. distance = 0.04 mm

List of spectra:  
 Foreground: Measured spectrum

**Figure S3.** ED-XRF of final nanocatalyst (Cu@DHA@APTES@MGO).

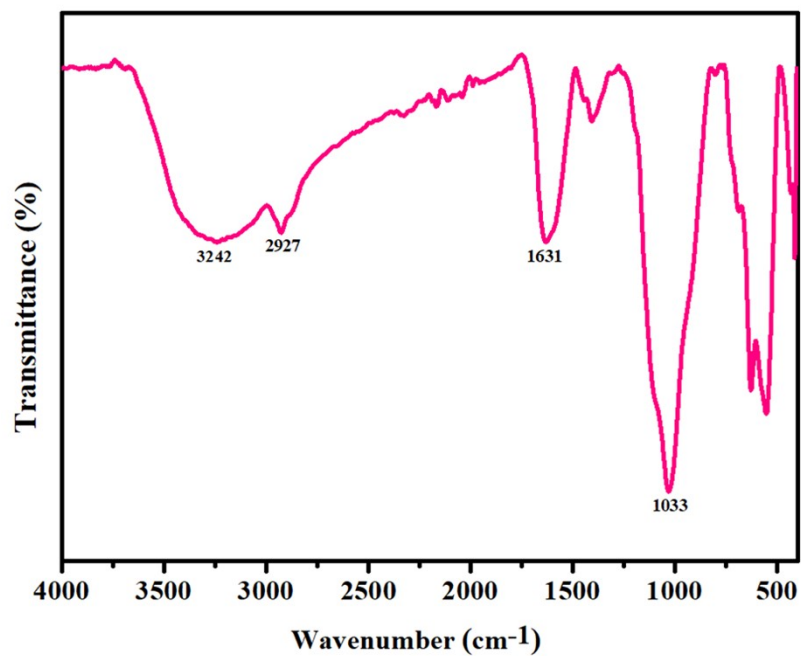

**Figure S4.** FT-IR of recovered catalyst.

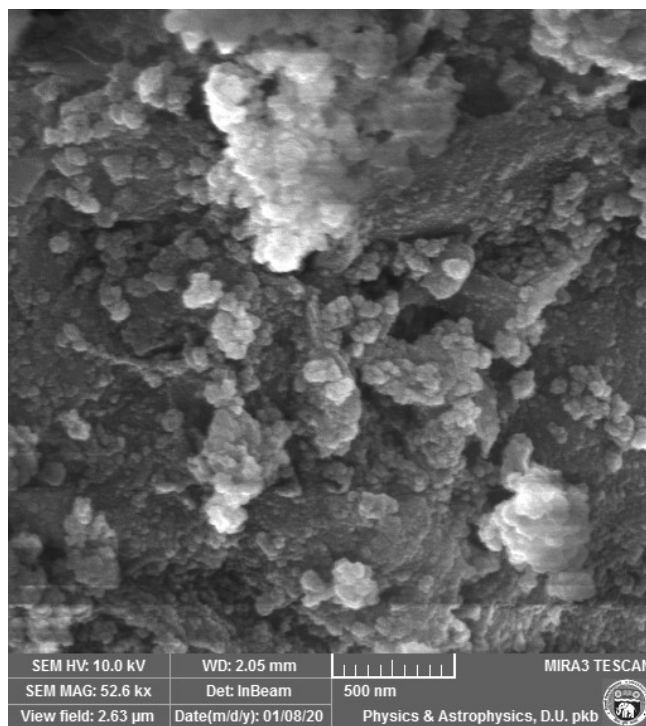

**Figure S5.** FESEM of recovered catalyst.

### Comparison of method for the synthesis of benzoxazoles with literature precedents

Mayo *et al.* for the first time introduced the novel pathway for cyclization of 2-aminophenols and  $\beta$ -diketones for obtaining relatively large number of benzoxazole scaffolds (scheme S1). 2-aminophenol and 2,4-pentanedione were employed as test substrates using p-toluenesulphonic acid as co-catalyst and copper iodide (CuI) as catalyst.<sup>1</sup>

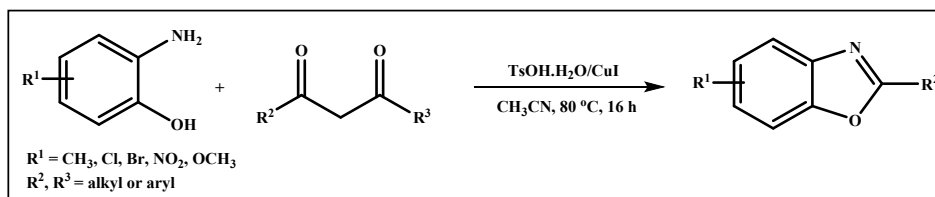

**Scheme S1** Synthesis of benzoxazoles from 2-aminophenols and  $\beta$ -Diketones by using CuI as catalyst and p-TsOH as co-catalyst.

Another approach used for the synthesis of benzoxazoles and its derivatives reported by Tiwari and his colleagues was copper catalyzed tandem cyclization of 2-halophenols with amidines. This reaction was carried out in basic medium using KOH as base and DMF as solvent at 120 °C for 16 h (scheme S2).<sup>2</sup>

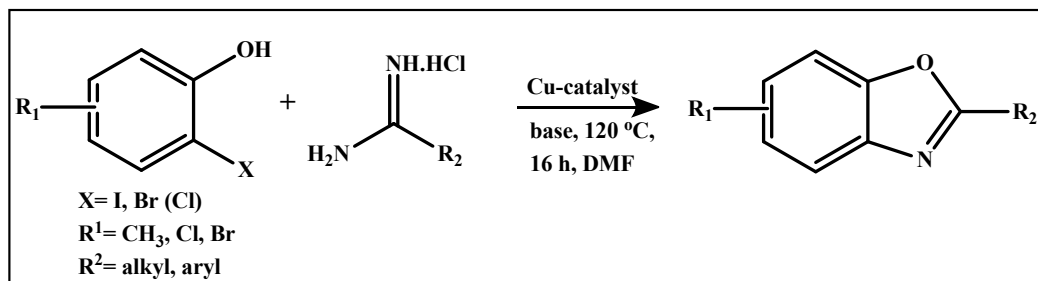

**Scheme S2** Synthesis of benzoxazoles from 2-halophenols with amidines using CuI as catalyst.

The synthetic strategy employed by Aboonajmi and co-workers used coupling of catechols, ammonium acetate and alkenes/alkynes/ketones for the synthesis of benzoxazoles and its derivatives (scheme S3).<sup>3</sup> Authors also synthesized desired products by using different styrenes and phenylacetylenes.

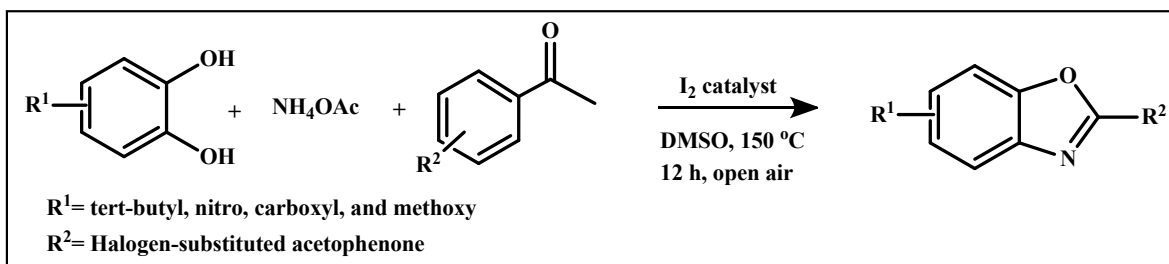

**Scheme S3** Use of different ketone sources and catechols in the benzoxazole synthesis using I<sub>2</sub> as catalyst.

Hydroamination of alkynones with 2-aminophenols catalyzed by Cu(OTf)<sub>2</sub> was reported by Oshimoto and team in which authors have produced a wide variety of benzoxazoles derivatives with good yield.<sup>4</sup>

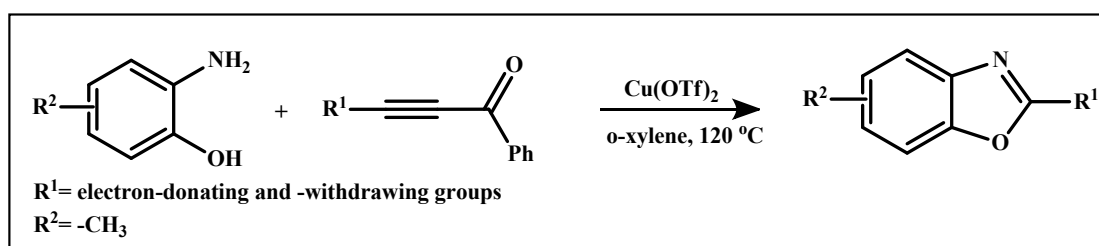

**Scheme S4** ortho-C–H functionalization of phenols with nitroalkanes to synthesize benzoxazoles.

A variety of methods have been reported in literature for the synthesis of benzoxazoles and we have compared few methods with out present protocol. Unfortunately, methodologies used in literature precedents involved the utilization of homogeneous catalytic system, high reaction temperatures and harsh solvents which hinder their commercial applicability due to the problems associated with separation and recovery of catalyst. In the present work, we reported a magnetically retrievable graphene oxide based copper nanocatalytic system that has been exploited for the

synthesis of benzoxazoles *via* cyclization of 2-aminophenols and  $\beta$ -diketones with excellent conversion percentage.

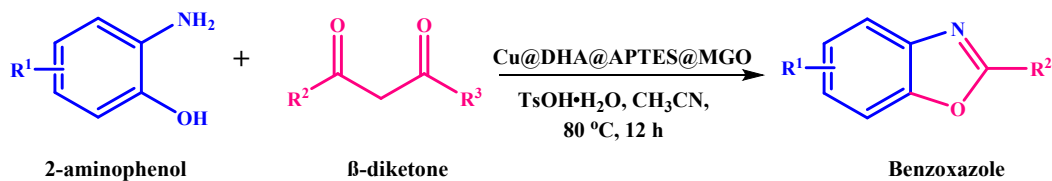

**Scheme S5** Synthesis of benzoxazoles from 2-aminophenols and  $\beta$ -Diketones Cu@DHA@APTES@MGO nanocatalyst.

### Mass spectra of synthesized amide products

### Table 2 in the manuscript

### ENTRY 2

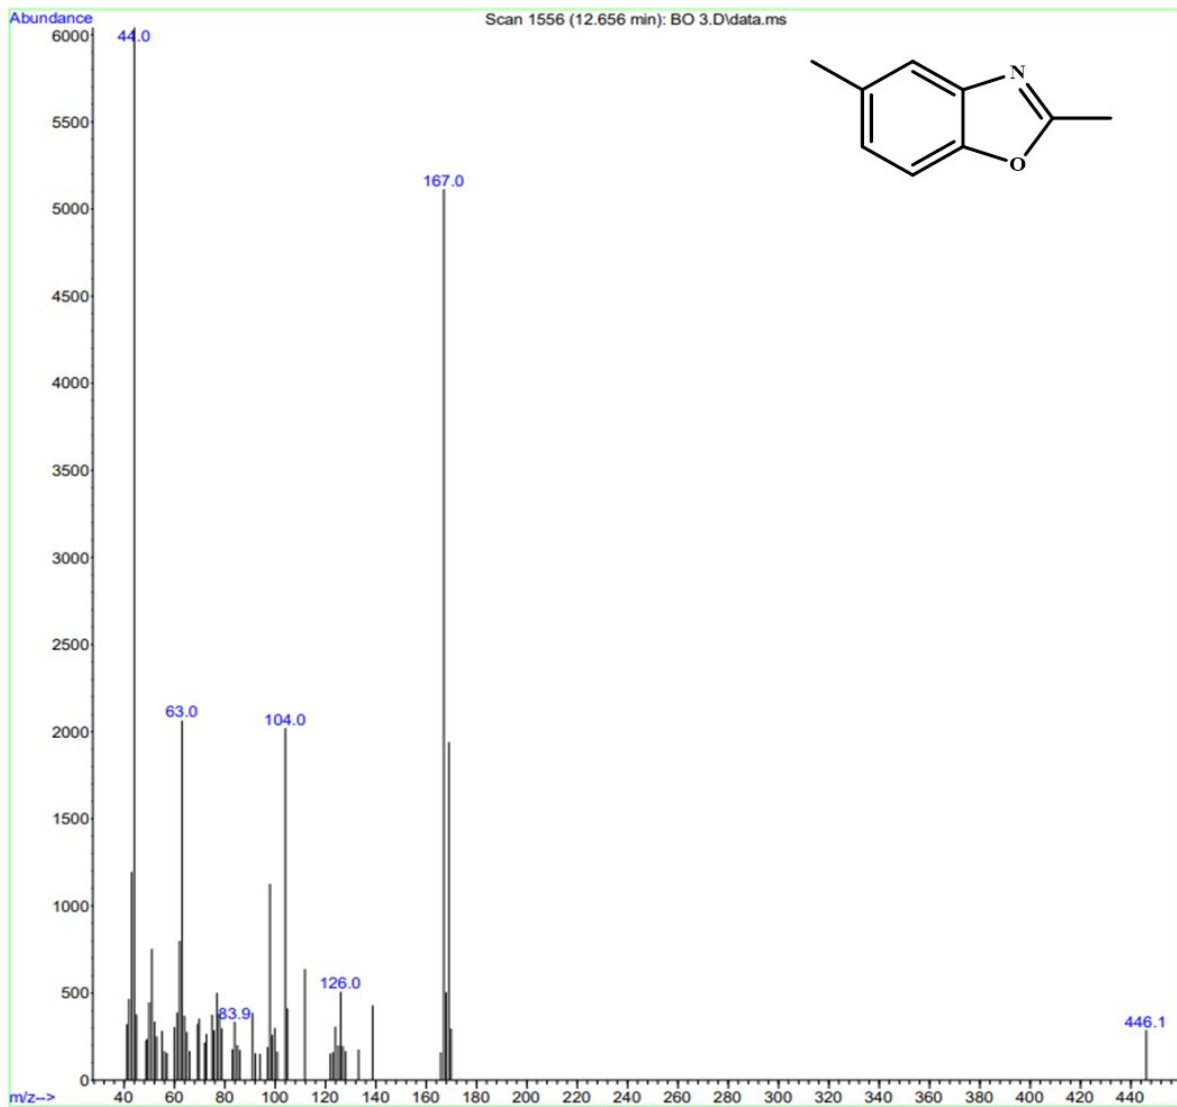

**ENTRY 6**

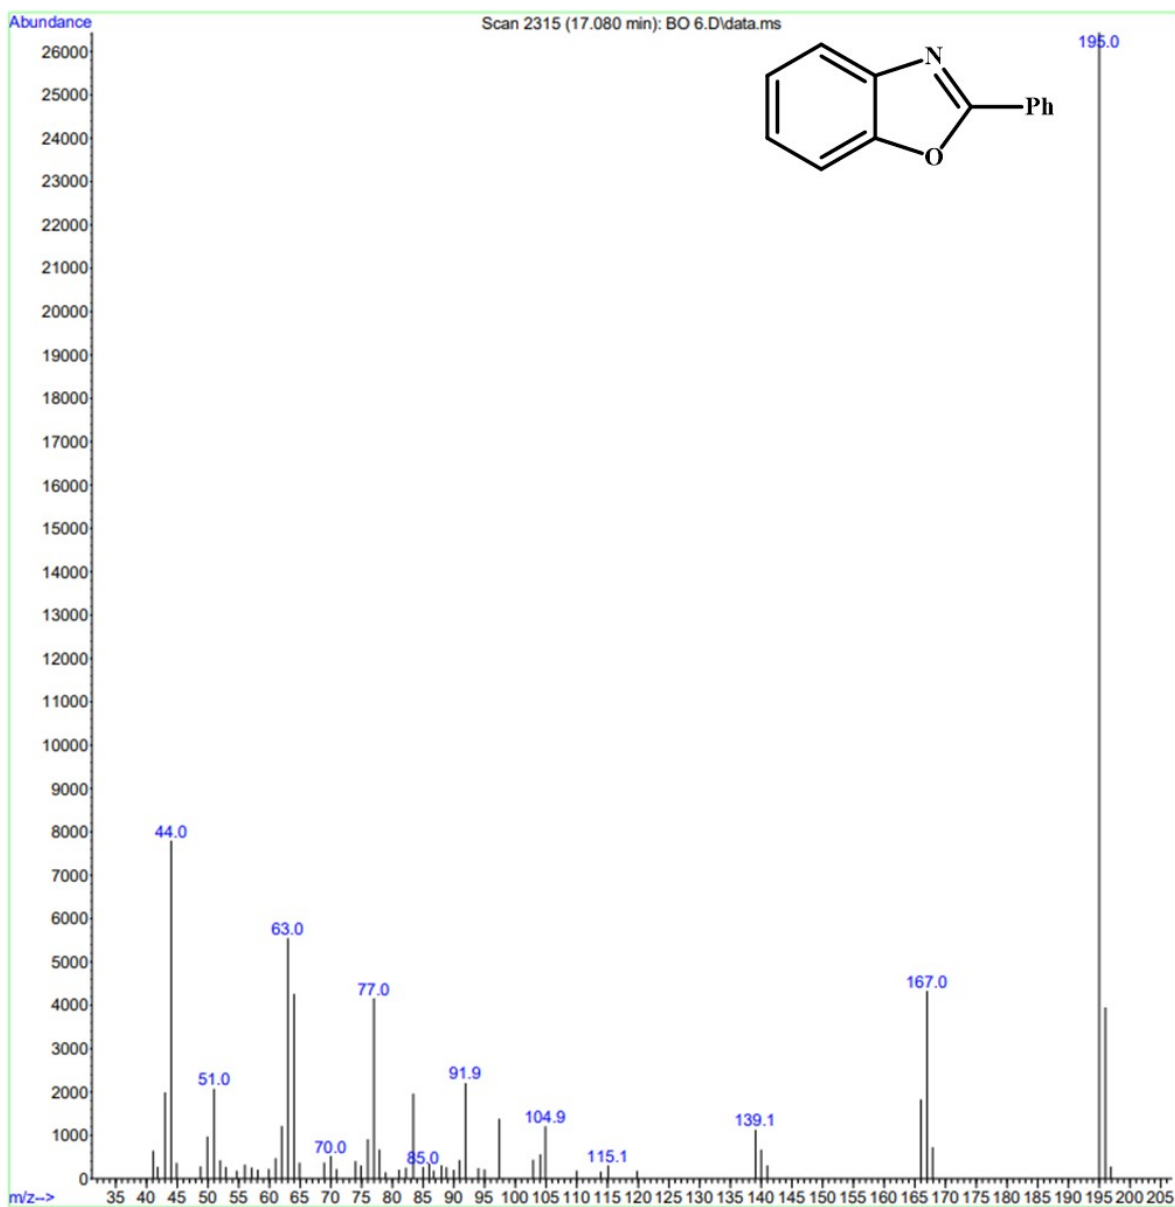

**ENTRY 7**



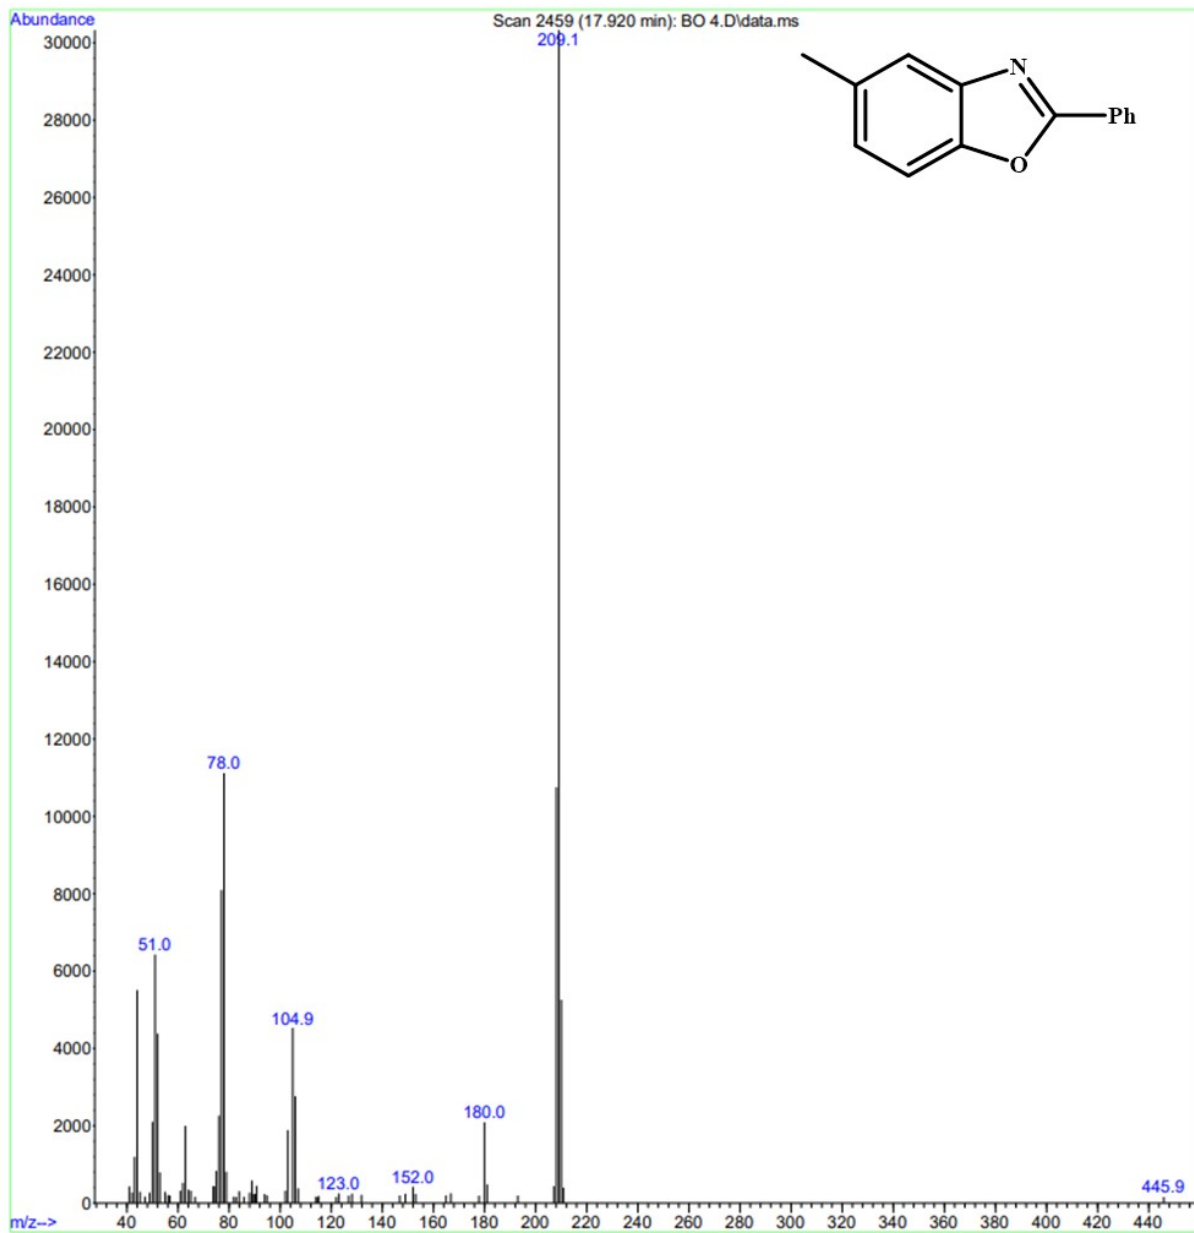

**ENTRY 8**

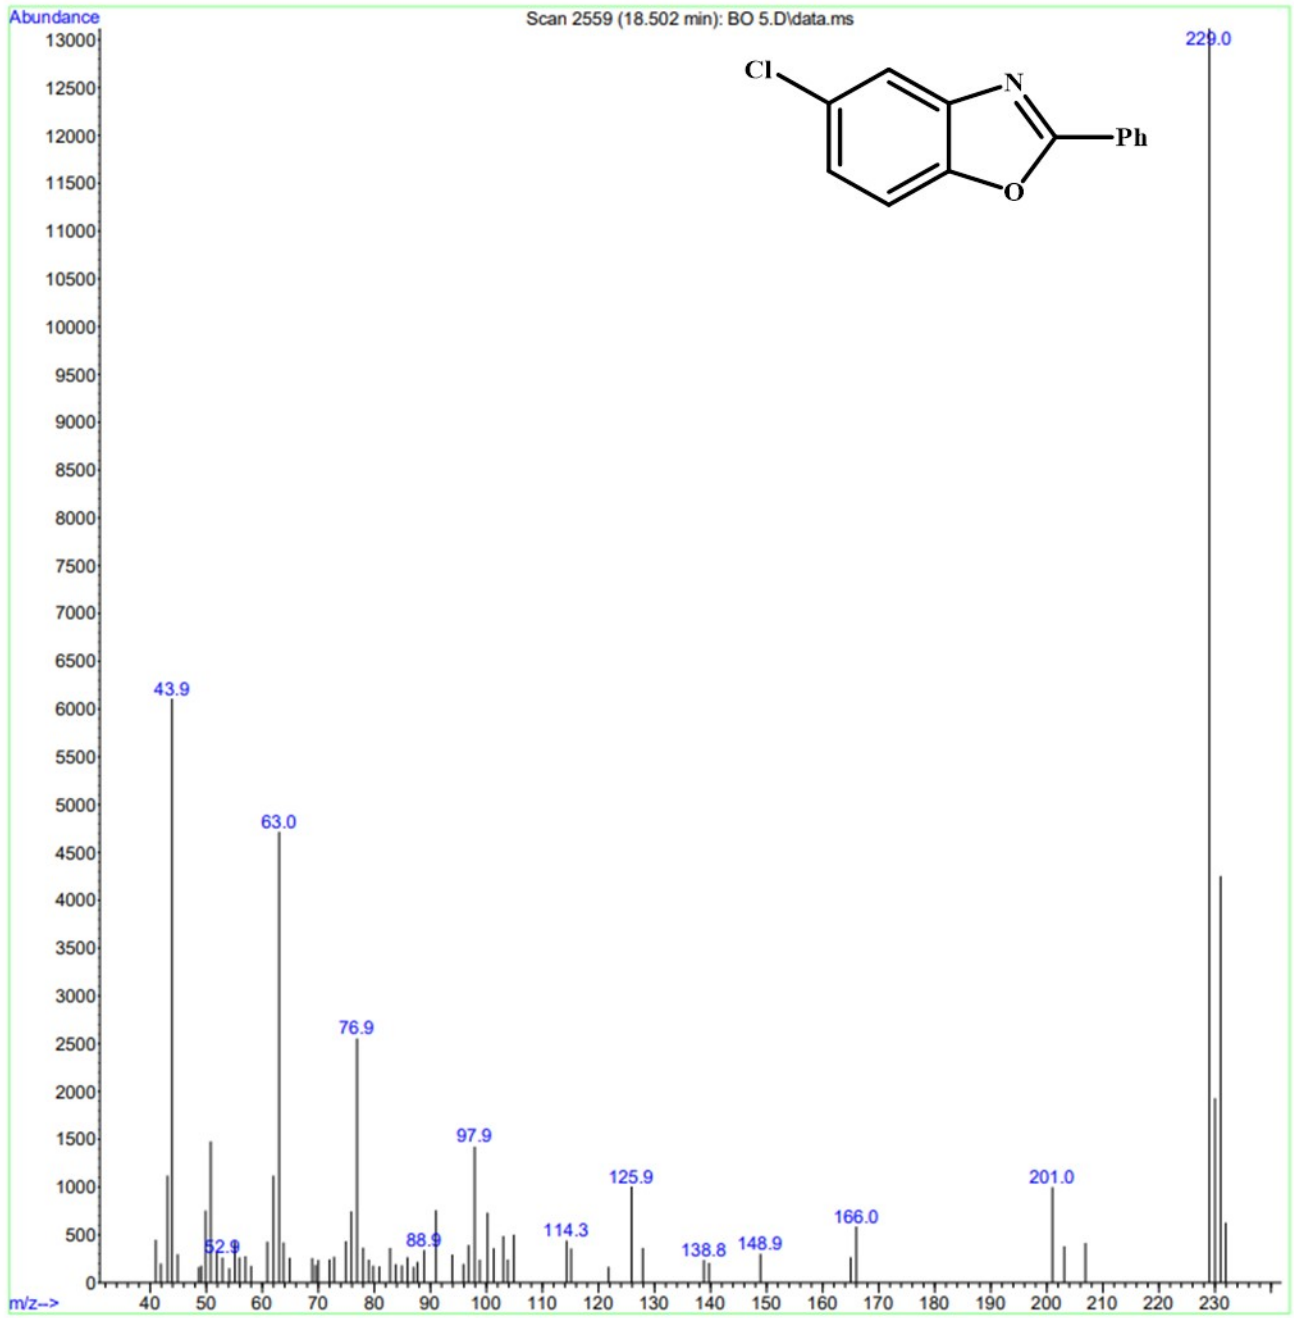

**ENTRY 10**

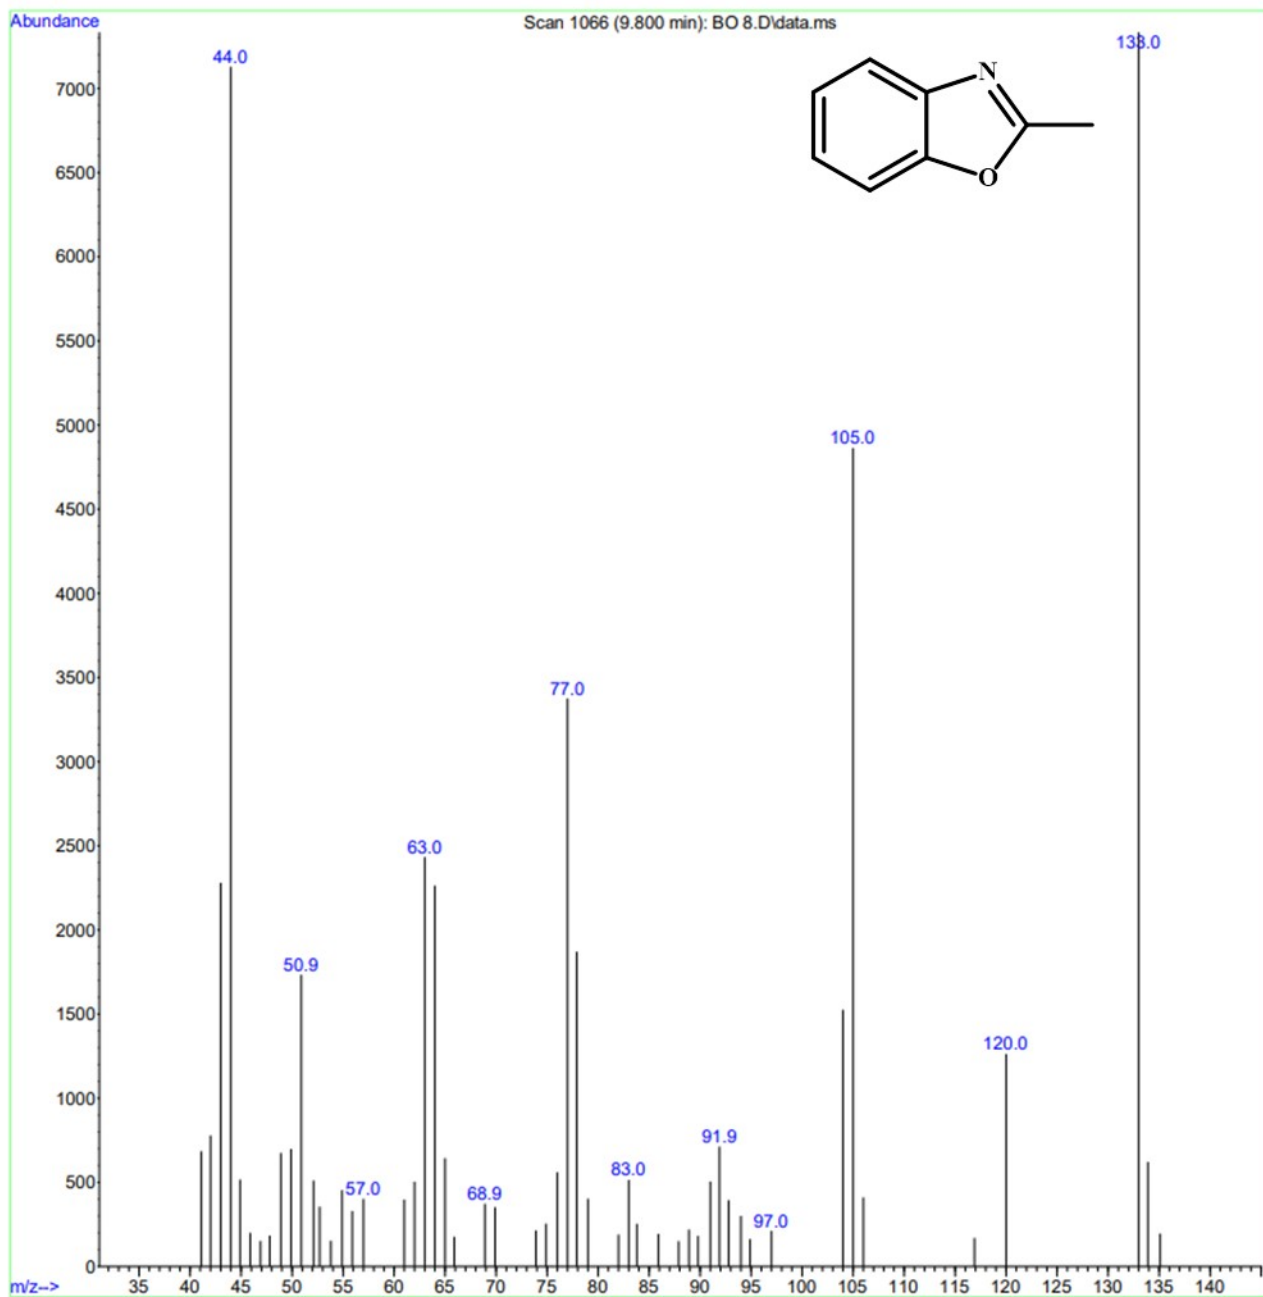

## References

1. M.S. Mayo, X. Yu, X. Zhou, X. Feng, Y. Yamamoto, M. Bao, *J. Org. Chem.* 2014, **79**, 6310-6314.
2. A. R. Tiwari, B. M. Bhanage, *Org. Biomol. Chem.*, 2016, **14**, 7920-7926.

3. J. Aboonajmi, F. Panahi, M. A. Hosseini, M. Aberi, H. Sharghi, *RSC adv.*, 2022, **12**, 20968-20972.

4. K. Oshimoto, H. Tsuji, M. Kawatsura, *Org. Biomol. Chem*, 2019 **17**, 4225-4229.
